# Supplementary material
Source: Springer Nature journal article supplement (https://www.springermedizin.de/resource/supplementary/12913_2011_1883_MOESM4_ESM.pdf/9529162)

### Respiratory Frequency at arrival with Serious Evolution

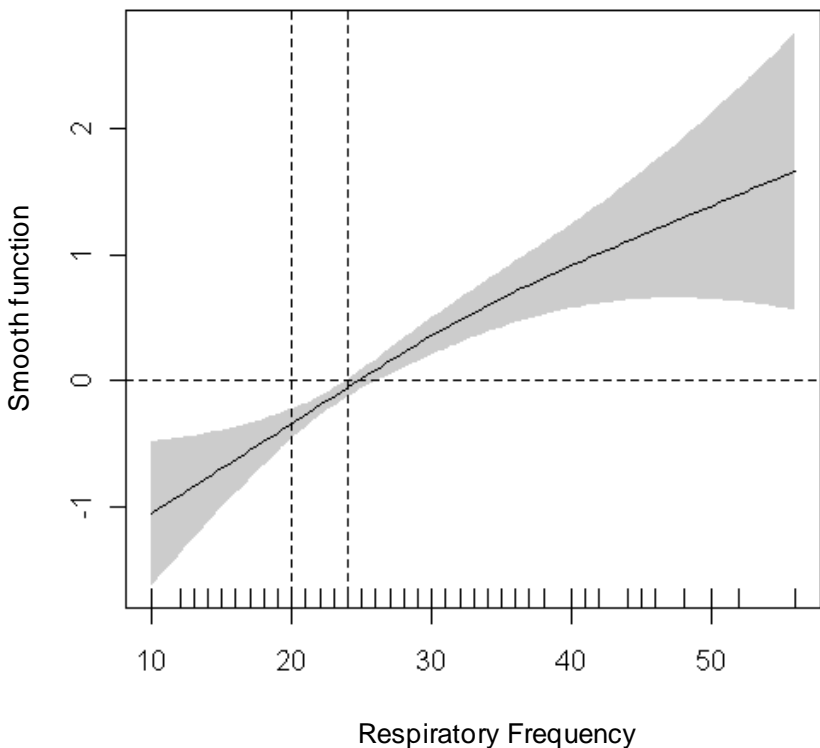

### Respiratory Frequency at decision time with Serious Evolution

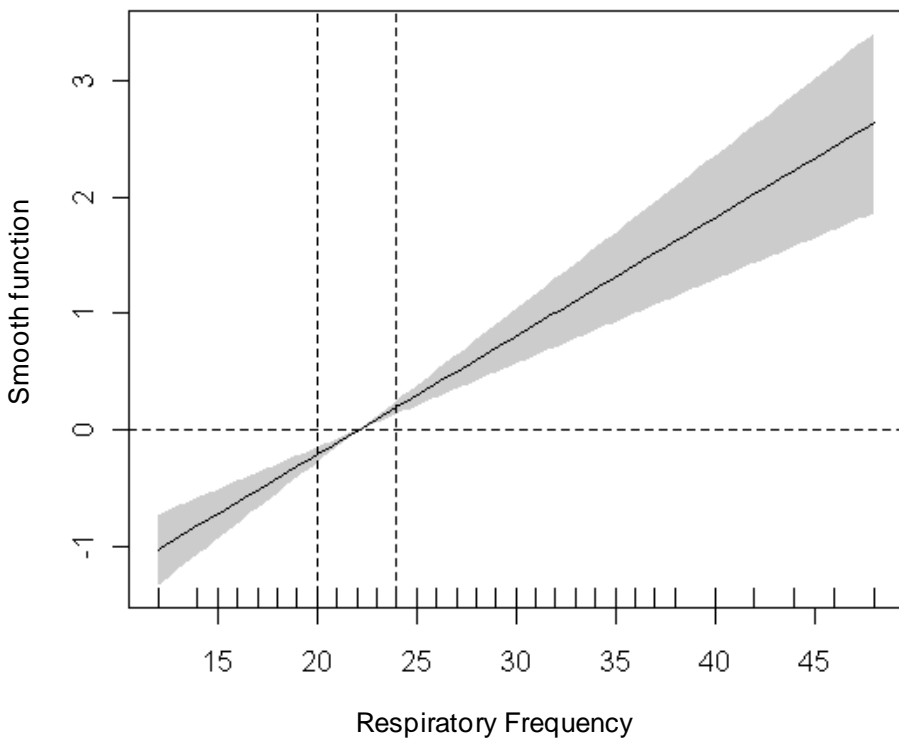

Supplement: MOESM4 [file 9529162]
